# Supplementary material for: Shortening the Lipid A Acyl Chains of Bordetella pertussis Enables Depletion of Lipopolysaccharide Endotoxic Activity
Source: MDPI journal article supplement (doi:10.3390/vaccines8040594), 2020-10-09
Supplement: s1 [file s1]

**Table S1. Primers used in this study**

**Commented [M1]:** Please provide the table S1 in the correct form.

| Goal PCR                                          | Primer name                          | Sequence (5'→3') <sup>a</sup>                            | Remarks |
|---------------------------------------------------|--------------------------------------|----------------------------------------------------------|---------|
| <i>Preparation of plasmids for overexpression</i> |                                      |                                                          |         |
| pMMB67EH-LpxA <sub>P<sub>3</sub></sub>            | LpxA <sub>P<sub>3</sub></sub> Fw     | AAGCGCGCCATATGAGTTTGATCGATGCTCG                          | NdeI    |
|                                                   | LpxA <sub>P<sub>3</sub></sub> Rev    | AAGCGCGAAGCTTATCAGCGGGTGATGCCGCGGTTGCGCT                 | HindIII |
| pMMB67EH-LpxL <sub>Nim</sub>                      | LpxL <sub>Nim</sub> Fw               | AACGCGCGCATATGAAATTTATATTTTTGTACT                        | NdeI    |
|                                                   | LpxL <sub>Nim</sub> Rev              | AAGCGCGCAAGCTTTCAGTAAAAATCGGGGCTGCCTTCG                  | HindIII |
| pMMB67EH-LpxL <sub>P<sub>g</sub></sub>            | LpxL <sub>P<sub>g</sub></sub> Fw     | AAGCGCGCATATGAAAGCGACACTTTCCT                            | NdeI    |
|                                                   | LpxL <sub>P<sub>g</sub></sub> Rev    | AAGCGCGCAAGCTTTCATAGTTGTCGGTATTATGCA                     | HindIII |
| pMMB67EH-LpxD <sub>P<sub>3</sub></sub>            | LpxD <sub>P<sub>3</sub></sub> Fw     | CGCGCGCATATGATGAGTACCTTGTCTTA                            | NdeI    |
|                                                   | LpxD <sub>P<sub>3</sub></sub> Rev    | CGCGCGAAGCTTTTAATGATGATGATGATGATGATGGCCGCCGCCGCATCAGATGA | HindIII |
| <i>Preparation of plasmids to knock out genes</i> |                                      |                                                          |         |
| <i>lpxL<sub>2</sub>::gm</i>                       | LpxL <sub>2Bp</sub> Fw               | GCGCGCACGCGTAGGCAATTCAAGACCCGCGCGCTGA                    | MluI    |
|                                                   | LpxL <sub>2Bp</sub> Rev              | GCGCGCTCTAGACCGTTCCAGTCCACGGTAAG                         | XbaI    |
|                                                   | gm Fw MluI                           | TCAGCACGCGTCAATTCTCGAATTGACA                             | MluI    |
|                                                   | gm Rev MluI                          | GGTCAGACGCGTCGCCGGGAAGCCGATCTC                           | MluI    |
| <i>RT-PCR assays</i>                              |                                      |                                                          |         |
| <i>lpxL<sub>P<sub>3</sub></sub></i>               | LpxA <sub>P<sub>3</sub></sub> Fw RT  | CCATTGGCGACCACAACCTG                                     |         |
|                                                   | LpxA <sub>P<sub>3</sub></sub> Rev RT | TGCCGAAGACCGTCACGTAG                                     |         |
| <i>lpxL<sub>Nim</sub></i>                         | LpxL <sub>Nim</sub> Fw RT            | TGAAATCGCTGGTGCGCTAC                                     |         |
|                                                   | LpxL <sub>Nim</sub> Rev RT           | ATCGGGCAGATACAGAAACG                                     |         |
| <i>lpxL<sub>P<sub>g</sub></sub></i>               | LpxL <sub>P<sub>g</sub></sub> Fw RT  | GTGCTACCGCTATGGATGGT                                     |         |
|                                                   | LpxL <sub>P<sub>g</sub></sub> Rev RT | CTATACCACGCGAACC GAAT                                    |         |
| <i>amp</i>                                        | Amp Fw RT                            | CTATGTGGCGCGGTATTATC                                     |         |
|                                                   | Amp Rev RT                           | CAACTTTATCCGCCTCCATC                                     |         |
