# Supplementary material for: Shortening the Lipid A Acyl Chains of Bordetella pertussis Enables Depletion of Lipopolysaccharide Endotoxic Activity
Source: MDPI journal article supplement (doi:10.3390/vaccines8040594), 2020-10-09
Supplement: s1 [file s1]

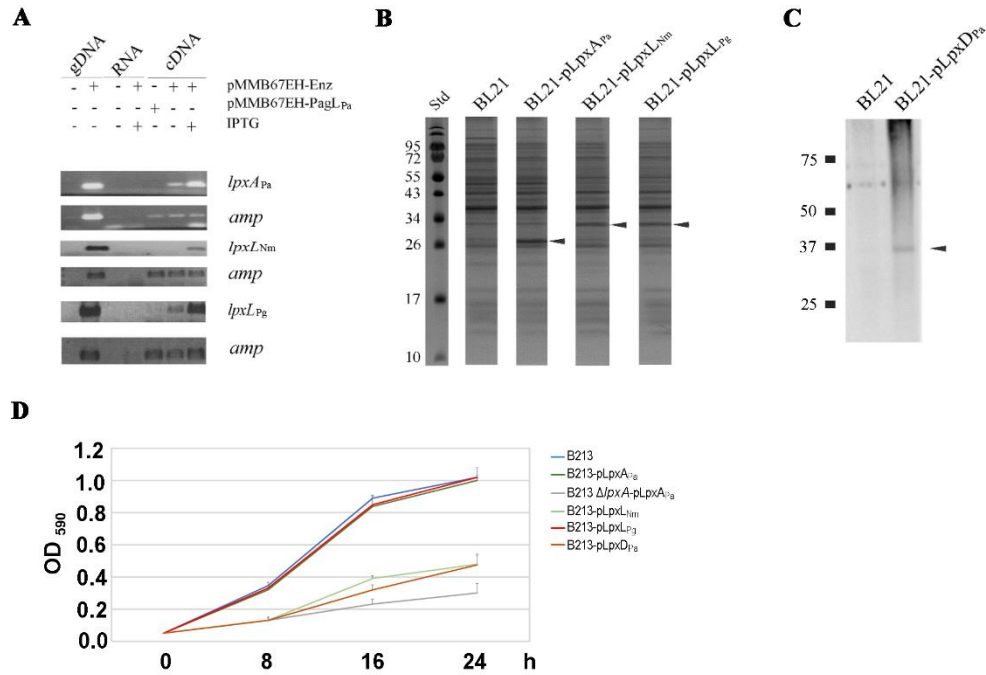

**Figure S1.** Expression of recombinant genes in *E. coli* BL21(DE3) and *B. pertussis* B213.

(A) Agarose gels showing PCR products obtained with primers targeting the genes of interest or the *amp* gene encoding  $\beta$ -lactamase (as indicated on the right) from preparations of genomic DNA (gDNA), RNA or cDNA obtained from BL21(DE3) derivatives carrying various recombinant pMMB67EH plasmids (pMMB67EH-Enz). The strain carrying pMMB67EH-PagL<sub>Pa</sub>, which consist of the same vector, but with an irrelevant insert (the *pagL* gene of *P. aeruginosa*), was used as a negative control to demonstrate specificity of the PCRs. Bacteria were grown in LB medium in the presence or absence of IPTG as indicated at the top. (B) Coomassie blue-stained gel loaded with whole-cell lysates of BL21(DE3) derivatives expressing genes for acyl transferases from plasmids as indicated at the top. The bacteria were grown in the presence of IPTG. IPTG-induced bands are indicated with arrowheads at the right. The positions of molecular mass markers (Std) are indicated in kDa at the left. Predicted molecular masses of LpxA<sub>Pa</sub>, LpxL<sub>Nm</sub> and LpxL<sub>Pg</sub> are 28, 33.8 and 36.4 kDa, respectively. (C) Western blot probed with an anti-His-tag antiserum showing the production of LpxD<sub>Pa</sub> in BL21-pL<sub>lpxD<sub>Pa</sub></sub>

grown with IPTG. The calculated molecular mass of the His-tagged LpxD<sub>Pa</sub> is 36.9 kDa.

(D) Implication of the expression of heterologous enzymes on the growth of *B. pertussis*.

The OD<sub>590</sub> of cultures of B213 and derivatives expressing *lpxA*<sub>Pa</sub>, *lpxL*<sub>Nm</sub>, *lpxL*<sub>Pg</sub> or *lpxD*<sub>Pa</sub> from pMMB67EH plasmids after 8, 16, and 24 h of growth in Verweij medium in the presence of IPTG is shown. The starting OD<sub>590</sub> was 0.05. Data are from two experiments performed in duplicate of which average and standard deviation are given.

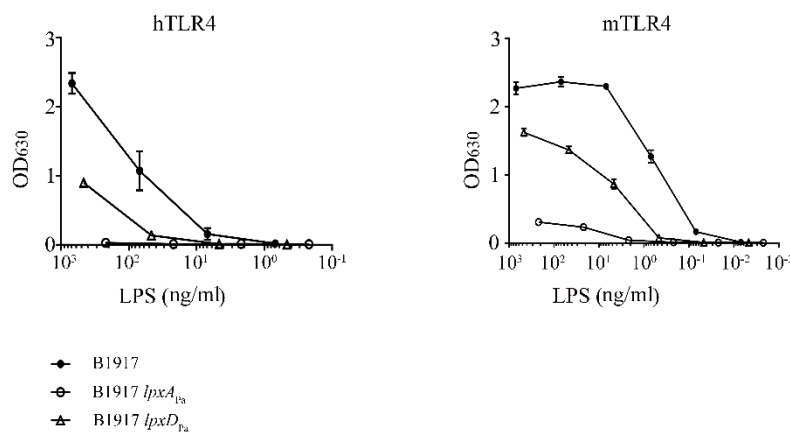

**Figure S2.** Bioactivity of LPS of strain B1917 and derivatives. Stimulation of HEK293-Blue cells expressing either hTLR4 or mTLR4 with purified LPS preparations of strains B1917, B1917 *lpxA*<sub>Pa</sub>, and B1917 *lpxD*<sub>Pa</sub> was performed as described in the legend to Fig. 3. Graphs show data from a representative experiment of three repeats.

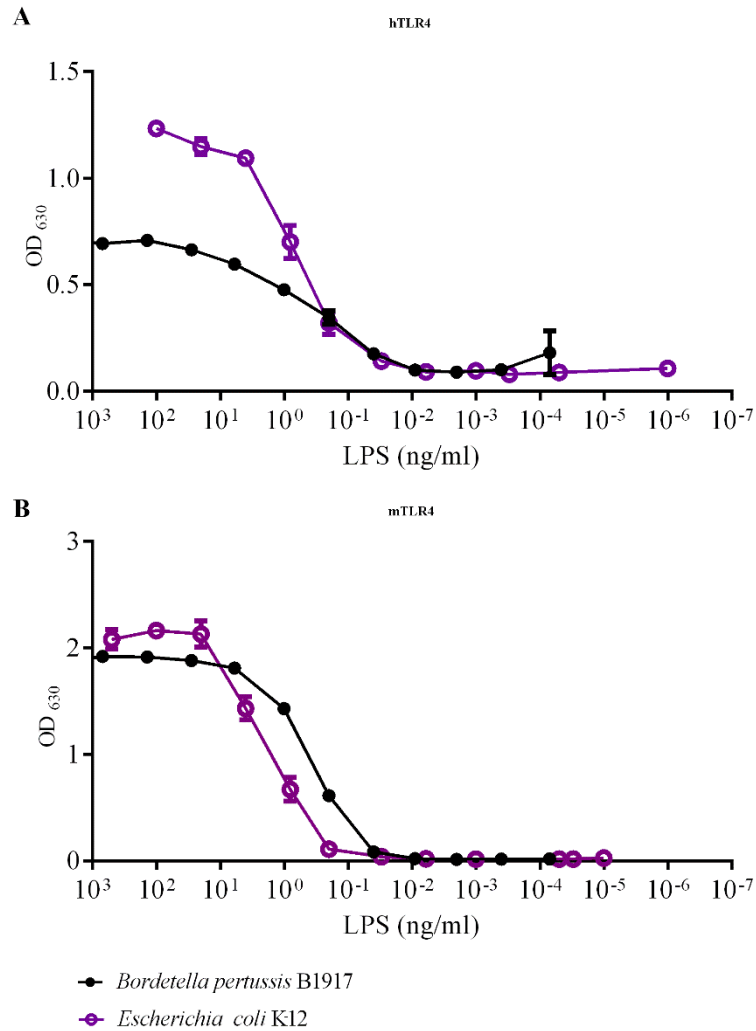

**Figure S3.** Comparison of the bioactivity of LPS of *B. pertussis* and *E. coli* LPS. Stimulation of HEK293-Blue cells expressing either hTLR4 (**A**) or mTLR4 (**B**) with purified LPS preparations of *B. pertussis* strain B1917 and *E. coli* K-12 was performed as described in the legend to Fig. 3. Graphs show data from a representative experiment of three repeats.

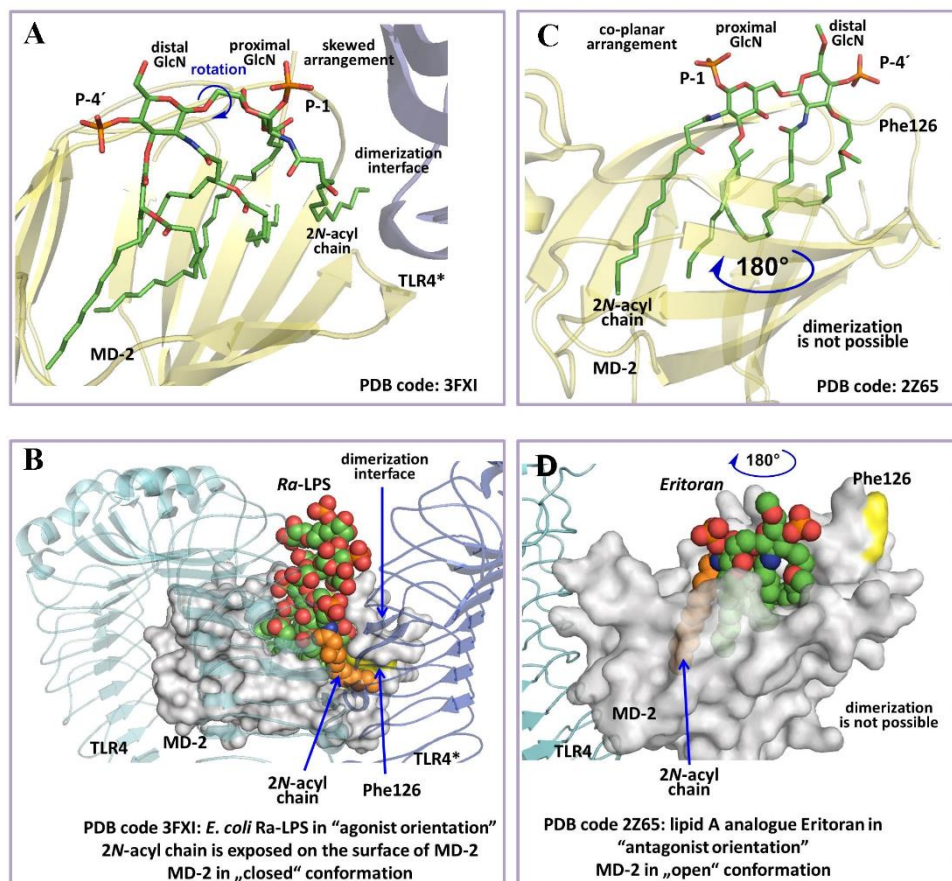

**Figure S4.** Binding of agonist and antagonist lipid A variants by TLR4/MD-2 complex.

(A) hMD-2 with bound *E. coli* Ra-LPS (PDB: 3FXI); only the lipid A portion is shown for clarity. The glucosamine (GlcN) rings of the di-glucosamine backbone of lipid A are in twisted arrangement due to rotation about (1→6) glycosidic and exocyclic oxymethyl linkages. Upon binding of *E. coli* hexa-acylated lipid A by the TLR4/MD-2 complex (binding in "agonist orientation") the distal GlcN ring bearing four acyl chains is fixed in the binding pocket of MD-2, whereas the proximal glucosamine ring (which points to dimerization interface) is relocated in a tilted orientation which assists in exposure of one

acyl chain (2*N*-acyl chain) on the surface of MD-2; **(B)** hMD-2 with bound *E. coli* Ra-LPS (PDB: 3FXI and 3VQ1). The 2*N*-acyl chain is highlighted in orange. **(C)** hMD-2 with bound TLR4 antagonist Eritoran (PDB code: 2Z65). The orientation of the diglucosamine backbone of lipid A is inverted by 180°. The two GlcN rings of the diglucosamine backbone of lipid A are arranged in one plane (antagonist orientation); **(D)** hMD-2 with bound antagonist lipid A analogue Eritoran (PDB: 2Z65 and 2E59); all acyl chains are inserted into the binding pocket of MD-2. The 2*N*-acyl chain is highlighted in orange. Images were generated with PyMol.
